# Supplementary material
Source: PubMed Central journal article supplement (PMC8390407)

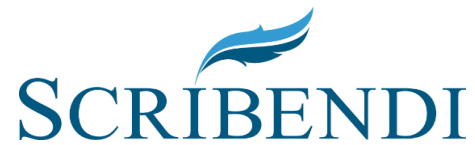

## Certificate of Editing and Proofreading

This certifies that a version of the document titled

**Vaccine Hesitancy towards Childhood Immunizations as a predictor of Mothers' Intention to Vaccinate Their Children against COVID-19 in Saudi Arabia**

was edited and/or proofread by Scribendi as order number

**808622**

for clarity, consistency, and correctness according to the requirements and guidelines specified by the client.

**Saturday, August 21, 2021**

*Scribendi Inc*

SCRIBENDI INC.  
405 RIVERVIEW DRIVE  
CHATHAM, ON N7M 0N3 CANADA  
+1 (519) 351 1626

[www.scribendi.com](http://www.scribendi.com)

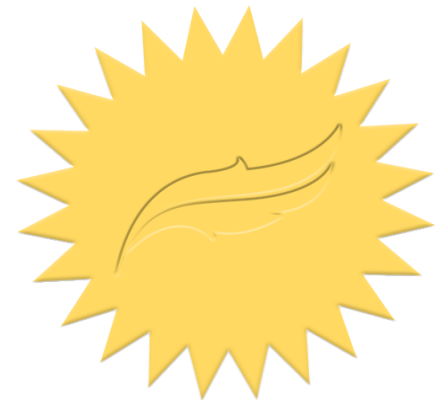

Supplement: mmc1.pdf [file mmc1.pdf]
